# Supplementary material for: Ionic liquids and plastic crystals utilising the oxazolidinium cation: the effect of ether functionality in the ring
Source: Royal Society of Chemistry journal article supplement (doi:10.1039/d1qm00648g), 2021-01-01
Supplement: d1qm00648g1.pdf [file d1qm00648g1.pdf]

## Supporting Information

### Ionic Liquids and Plastic Crystals Utilising the Oxazolidinium Cation: The Effect of Ether Functionality in the Ring

Colin S. M. Kang,<sup>a,b</sup> Ruhamah Yunis,<sup>a</sup> Haijin Zhu,<sup>c</sup> Cara M. Doherty,<sup>d</sup> Oliver E. Hutt,<sup>b</sup> Jennifer M. Pringle<sup>a\*</sup>

<sup>a</sup>Institute for Frontier Materials, Deakin University, Burwood VIC, 3125, Australia

<sup>b</sup>Boron Molecular, 500 Princes Hwy, Noble Park VIC, 3174, Australia

<sup>c</sup>Institute for Frontier Materials, Deakin University, Geelong VIC, 3220, Australia

<sup>d</sup>Commonwealth Scientific and Industrial Research Organisation (CSIRO), Manufacturing, Clayton VIC, 3168, Australia

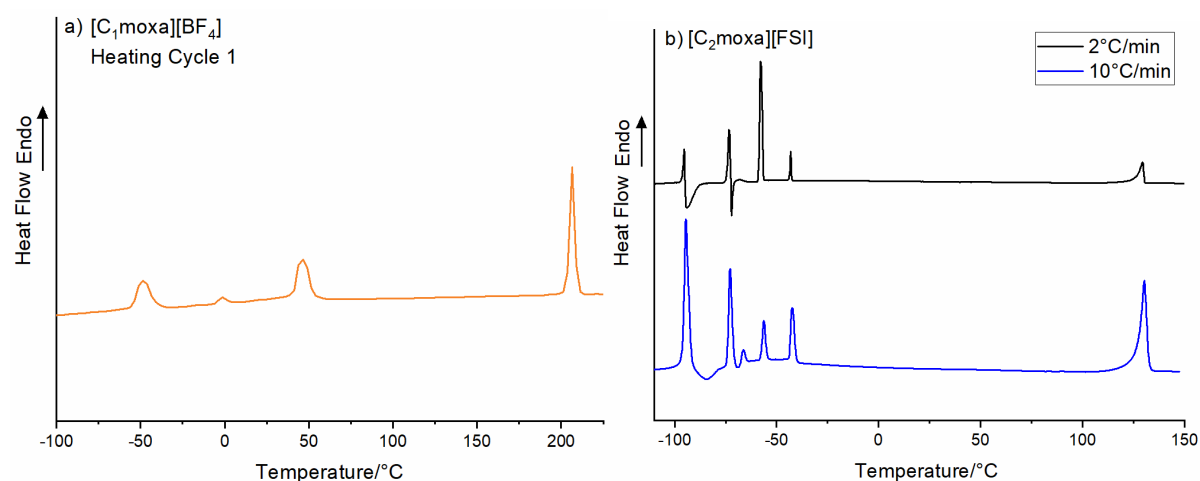

Supporting Figure S1: DSC trace of a) [C<sub>1</sub>moxa][BF<sub>4</sub>] at 10 °C min<sup>-1</sup> on the first heating cycle, and b) [C<sub>2</sub>moxa][FSI] at 10°C min<sup>-1</sup> and 2°C min<sup>-1</sup>.

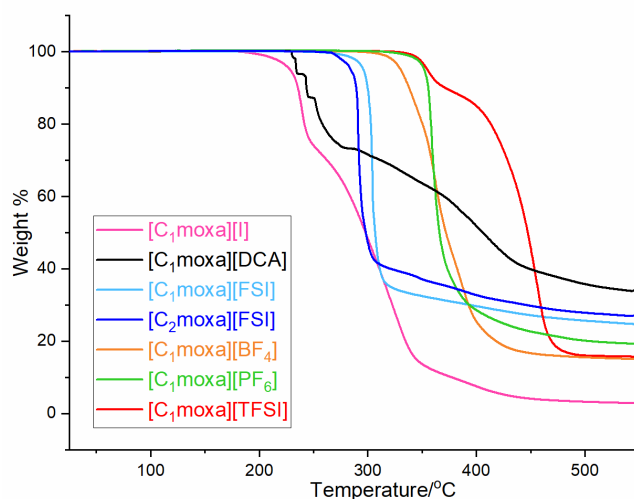

Supporting Figure S2: Thermal gravimetric analysis of oxazolidinium-based salts.

Supporting Table S1: Comparison of thermal properties and ionic conductivity of oxazolidinium and pyrrolidinium-based salts. ( $T_m \pm 1^\circ\text{C}$ ,  $\Delta S_f \pm 10\%$  and conductivity  $\pm 5\%$  for the data measured in the current work)

| Salt                                                   | $T_m$<br>/ $^\circ\text{C}$ | $\Delta S_f$<br>/ $\text{J K}^{-1} \text{mol}^{-1}$ | $T_{d(\text{onset})}$<br>/ $^\circ\text{C}$ | Conductivity at 30 $^\circ\text{C}$<br>/ $\text{S cm}^{-1}$ |
|--------------------------------------------------------|-----------------------------|-----------------------------------------------------|---------------------------------------------|-------------------------------------------------------------|
| [C <sub>1</sub> moxa][DCA]                             | 15                          | 11                                                  | 230                                         | $1.4 \times 10^{-2}$ (melt)                                 |
| [C <sub>1</sub> mpyr][DCA] <sup>1</sup>                | 115                         | 19                                                  | -                                           | $4.0 \times 10^{-7}$ (phase I)                              |
| [C <sub>1</sub> moxa][TFSI]                            | 72                          | 24                                                  | 340                                         | $2.3 \times 10^{-7}$ (phase I)                              |
| [C <sub>1</sub> mpyr][TFSI] <sup>2</sup>               | 132                         | 40                                                  | -                                           | $2.0 \times 10^{-9}$ (25 $^\circ\text{C}$ , phase I)        |
| [C <sub>1</sub> moxa][BF <sub>4</sub> ]                | 204                         | 12                                                  | 323                                         | $3.8 \times 10^{-7}$ (phase II)                             |
| [C <sub>1</sub> mpyr][BF <sub>4</sub> ] <sup>3,4</sup> | >340                        | n/a                                                 | 340                                         | $1.0 \times 10^{-7}$ (phase III)                            |
| [C <sub>1</sub> moxa][PF <sub>6</sub> ]                | >343                        | n/a                                                 | 343                                         | $2.7 \times 10^{-9}$ (phase I)                              |
| [C <sub>1</sub> mpyr][PF <sub>6</sub> ] <sup>5</sup>   | >390                        | n/a                                                 | 390                                         | n/a                                                         |
| [C <sub>1</sub> moxa][FSI]                             | 197                         | 4                                                   | 290                                         | $5.8 \times 10^{-7}$ (phase I)                              |
| [C <sub>1</sub> mpyr][FSI] <sup>6</sup>                | 286                         | 14                                                  | 304                                         | $2.0 \times 10^{-8}$ (phase I)                              |
| [C <sub>2</sub> moxa][FSI]                             | 127                         | 7                                                   | 280                                         | $5.7 \times 10^{-6}$ (phase I)                              |
| [C <sub>2</sub> mpyr][FSI] <sup>6</sup>                | 205                         | 11                                                  | 299                                         | $1.5 \times 10^{-6}$ (phase I)                              |

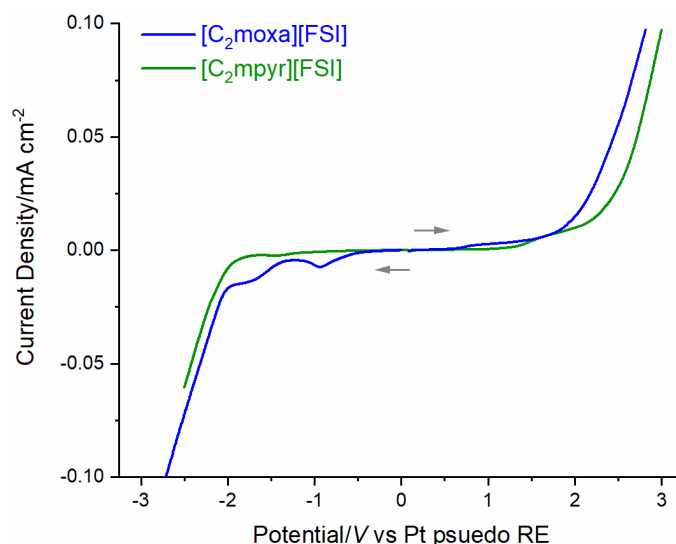

Supporting Figure S3: Cyclic voltammetry of [C<sub>1</sub>moxa][FSI] and [C<sub>2</sub>mpyr][FSI] at 70°C at a scan rate of 2 mV s<sup>-1</sup>, on a Pt working electrode, Pt coil counter electrode and Pt pseudo reference electrode. For clarity, only the forward sweep is shown.

## References

- (1) Adebahr, J.; Forsyth, M.; MacFarlane, D. R. Cation Dynamics in Dimethyl-Pyrrolidinium-Based Solid-State Ion Conductors. *Electrochim. Acta* 2005, 50 (19), 3853–3858.
- (2) MacFarlane, D. R.; Meakin, P.; Sun, J.; Amini, N.; Forsyth, M. Pyrrolidinium Imides: A New Family of Molten Salts and Conductive Plastic Crystal Phases. *J. Phys. Chem. B* 1999, 103 (20), 4164–4170.
- (3) Forsyth, S.; Golding, J.; MacFarlane, D. R.; Forsyth, M. N-Methyl-N-Alkylpyrrolidinium Tetrafluoroborate Salts: Ionic Solvents and Solid Electrolytes. *Electrochim. Acta* 2001, 46 (10–11), 1753–1757.
- (4) Jin, L.; Howlett, P.; Efthimiadis, J.; Kar, M.; MacFarlane, D.; Forsyth, M. Lithium Doped N,N-Dimethyl Pyrrolidinium Tetrafluoroborate Organic Ionic Plastic Crystal Electrolytes for Solid State Lithium Batteries. *J. Mater. Chem.* 2011, 21 (27), 10171–10178.
- (5) Golding, J.; Hamid, N.; MacFarlane, D. R.; Forsyth, M.; Forsyth, C.; Collins, C.; Huang, J. N-Methyl-N-Alkylpyrrolidinium Hexafluorophosphate Salts: Novel Molten Salts and Plastic Crystal Phases. *Chem. Mater.* 2001, 13 (2), 558–564.
- (6) Yamada, H.; Miyachi, Y.; Takeoka, Y.; Rikukawa, M.; Yoshizawa-Fujita, M. Pyrrolidinium-Based Organic Ionic Plastic Crystals: Relationship between Side Chain Length and Properties. *Electrochim. Acta* 2019, 303, 293–298.
